# Supplementary material for: Graphene/polypyrrole-coated carbon nanofiber core–shell architecture electrode for electrochemical capacitors
Source: Royal Society of Chemistry journal article supplement (doi:10.1039/c4ra14922j), 2015-01-01
Supplement: c4ra14922j1.pdf [file c4ra14922j1.pdf]

## Electronic Supplementary Information

### **Graphene/polypyrrole-coated carbon nanofiber core-shell architecture electrode for electrochemical capacitors**

**John Kevin Gan,<sup>1</sup> Yee Seng Lim,<sup>1</sup> Alagarsamy Pandikumar,<sup>1\*</sup> Nay Ming Huang,<sup>1\*</sup>  
Hong Ngee Lim<sup>2,3\*</sup>**

<sup>1</sup>Low Dimensional Materials Research Centre, Department of Physics, Faculty of Science,  
University of Malaya, 50603 Kuala Lumpur, Malaysia

<sup>2</sup>Department of Chemistry, Faculty of Science, Universiti Putra Malaysia,  
43400 UPM Serdang, Selangor, Malaysia

<sup>3</sup>Functional Device Laboratory, Institute of Advanced Technology, Universiti Putra Malaysia,  
43400 UPM Serdang, Selangor, Malaysia

Corresponding authors: huangnayming@um.edu.my (Huang N.M.),  
janet\_limhn@science.upm.edu.my (Lim H.N.) and  
pandikumarinbox@gmail.com (Pandikumar. A)

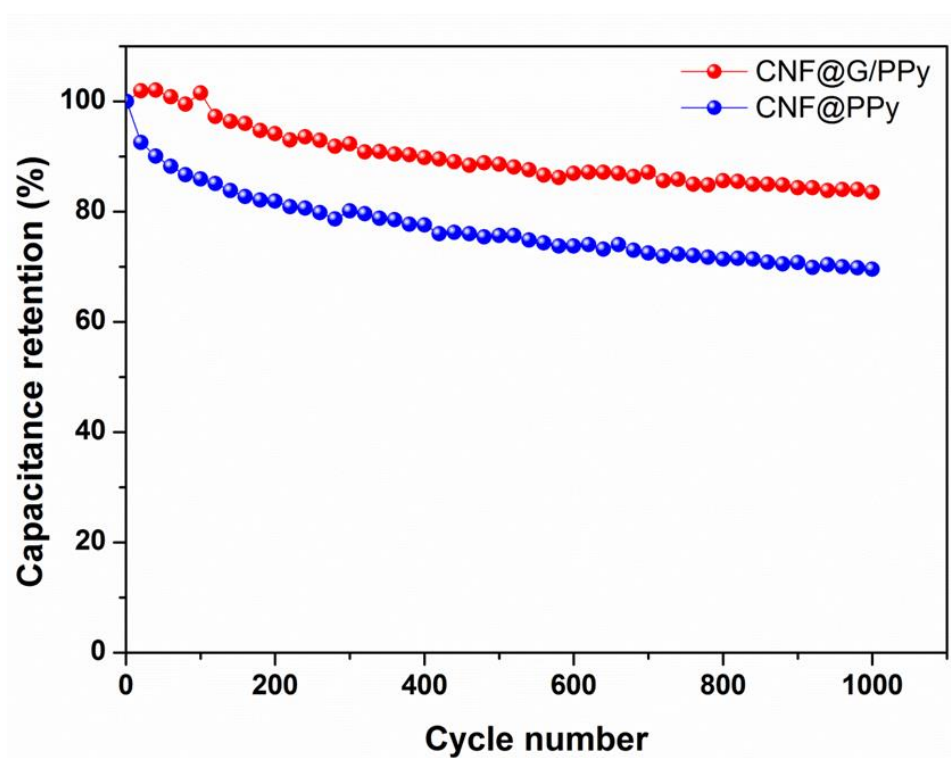

**Fig. S1** Comparison of cycling performance of the CNF@PPy and CNF@G/PPy core-shell electrodes at a current densities of 2 A g<sup>-1</sup> for 1000 cycles.

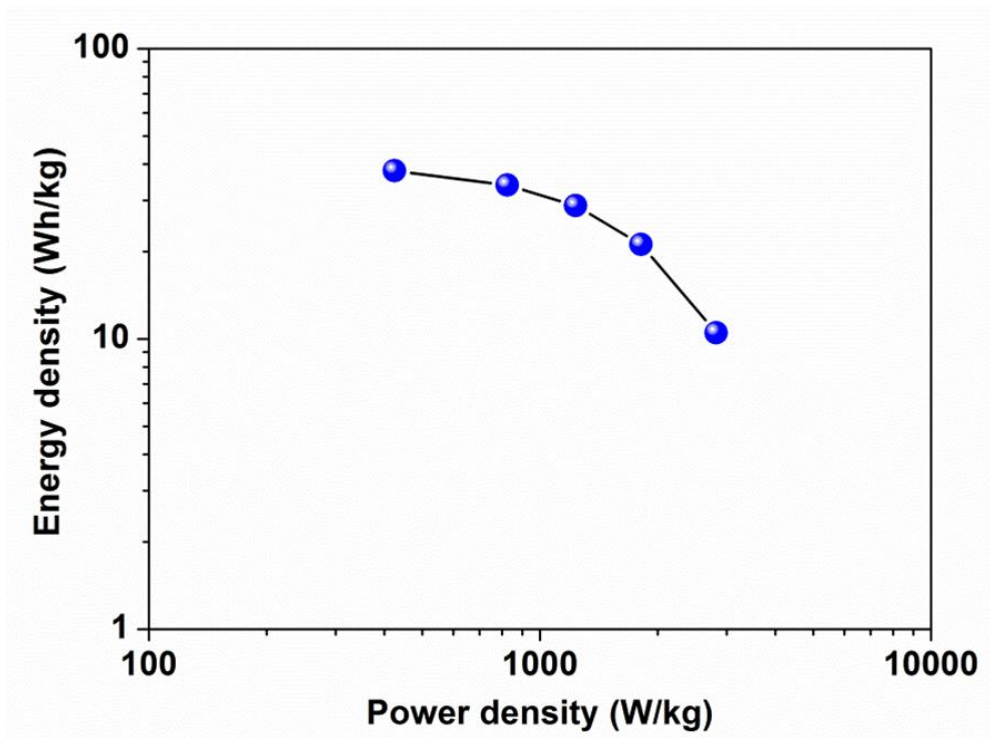

**Fig. S2** Ragone plot for the CNF@G/PPy core-shell electrode.
